# Supplementary material for: Exploring the Quality and Application Potential of the Remaining Tea Stems after the Postharvest Tea Leaves: The Example of Lu’an Guapian Tea (Camellia sinensis L.)
Source: MDPI journal article supplement (doi:10.3390/foods11152357), 2022-08-06
Supplement: s1 [file s1]

Table S1 Parameters of the calibration curves for the components and their limits of detection (LOD) and limits of quantification (LOQ)

| Compound               | Quantification curves | R <sup>2</sup> | LOD<br>μ g/mL | LOQ<br>μ g/mL |
|------------------------|-----------------------|----------------|---------------|---------------|
| Total tea polyphenol   | y=0.0124x             | 0.9995         | 10.00         | 50.00         |
| Total free amino acids | y=3.0570x-0.4148      | 0.9991         | 200.00        | 600.00        |
| Caffeine               | y=27.454x-17.722      | 0.9999         | 50.00         | 150.00        |
| Total soluble sugar    | y=180.35x-4.1682      | 0.9999         | 20.00         | 160.00        |
| EGC                    | y=2.0616x-15.127      | 0.9999         | 100.00        | 300.00        |
| C                      | y=6.5995x-23.179      | 0.9991         | 50.00         | 150.00        |
| EC                     | y=7.3643x-17.64       | 0.9998         | 50.00         | 150.00        |
| EGCG                   | y=12.675x-50.625      | 0.9999         | 100.00        | 400.00        |
| ECCG                   | y=13.901x-140.86      | 0.9999         | 50.00         | 180.00        |
| L-theanine             | y = 4472.3x -7.1252   | 0.9998         | 50.00         | 500.00        |

Note: The absorbance (A) or peak area is the vertical coordinate and the concentration of the substance is the horizontal coordinate.

Table S2 Parameters of the calibration curves for the free amino acids and their limits of detection (LOD) and limits of quantification (LOQ)

| Compound      | Molecular weight | Quantification curves  | R <sup>2</sup> | LOD<br>μ mol/mL | LOQ<br>μ mol/mL |
|---------------|------------------|------------------------|----------------|-----------------|-----------------|
| Aspartic      | 133              | $y = 745x - 8.25$      | 0.9978         | 0.02            | 0.20            |
| Serine        | 105              | $y = 817.58x + 0.0583$ | 0.9978         | 0.02            | 0.20            |
| Glutamic      | 147              | $y = 733.67x - 0.7667$ | 0.9961         | 0.02            | .020            |
| Glycine       | 75               | $y = 814.75x + 0.7417$ | 0.9948         | 0.02            | 0.20            |
| Histidine     | 155              | $y = 1682.3x + 9.6$    | 0.9952         | 0.02            | 0.20            |
| Arginine      | 174              | $y = 967x + 0.6333$    | 0.9980         | 0.02            | 0.20            |
| Threonine     | 119              | $y = 1144.6x - 13.775$ | 0.9922         | 0.02            | 0.20            |
| Proline       | 115              | $y = 979.25x - 5.4917$ | 0.9962         | 0.02            | 0.20            |
| Cysteine      | 121              | $y = 1043.4x + 2.175$  | 0.9994         | 0.02            | 0.20            |
| Tyrosine      | 181              | $y = 949.58x - 4.2417$ | 0.9973         | 0.02            | 0.20            |
| Valine        | 117              | $y = 1075.1x - 3.175$  | 0.9990         | 0.02            | 0.20            |
| Lysine        | 146              | $y = 1049.3x - 7.225$  | 0.9966         | 0.02            | 0.20            |
| Isoleucine    | 131              | $y = 1110.8x - 12.833$ | 0.9918         | 0.02            | 0.20            |
| Leucine       | 131              | $y = 1877.3x - 14.767$ | 0.9935         | 0.02            | 0.20            |
| Phenylalanine | 165              | $y = 941.64x - 2.3505$ | 0.9992         | 0.02            | 0.20            |

Note: The peak area is the vertical coordinate and the concentration of the substance is the horizontal coordinate.

Table S3 Parameters of the calibration curves for the monosaccharides and disaccharide and their limits of detection (LOD) and limits of quantification (LOQ)

| Compound    | Class          | Quantification curves            | R <sup>2</sup> | LOD<br>μ g/mL | LOQ<br>μ g/mL |
|-------------|----------------|----------------------------------|----------------|---------------|---------------|
| Lactose     | disaccharide   | $y = 0.024821 x - 7.929386E-006$ | 0.9981         | 0.003         | 0.300         |
| Sucrose     | disaccharide   | $y = 0.032313 x - 0.014041$      | 0.9952         | 0.300         | 40.00         |
| Trehalose   | disaccharide   | $y = 0.138757 x - 2.791236E-004$ | 0.9965         | 0.003         | 0.300         |
| Maltose     | disaccharide   | $y = 0.022863 x + 5.287298E-006$ | 0.9962         | 0.003         | 0.300         |
| D-Arabinose | monosaccharide | $y = 0.111964 x - 2.482961E-004$ | 0.9991         | 0.003         | 6.000         |
| D-Fructose  | monosaccharide | $y = 0.007089 x - 6.196312E-005$ | 0.9993         | 0.006         | 6.000         |
| L-Fucose    | monosaccharide | $y = 0.085968 x - 1.988209E-004$ | 0.9927         | 0.003         | 0.300         |
| D-Galactose | monosaccharide | $y = 0.001116 x - 3.672196E-006$ | 0.9956         | 0.003         | 0.300         |
| Glucose     | monosaccharide | $y = 0.109420 x - 7.648392E-004$ | 0.9922         | 0.006         | 6.000         |
| Inositol    | monosaccharide | $y = 0.045961 x - 9.790822E-005$ | 0.9965         | 0.003         | 1.500         |
| L-Rhamnose  | monosaccharide | $y = 0.012280 x + 5.712896E-005$ | 0.9957         | 0.003         | 0.300         |
| D-Sorbitol  | monosaccharide | $y = 0.160173 x - 7.038672E-004$ | 0.9971         | 0.006         | 6.000         |
| Xylitol     | monosaccharide | $y = 0.069807 x - 9.152151E-005$ | 0.9950         | 0.003         | 0.300         |

Note: The concentration ratio of the external and internal standards is used as the horizontal coordinate and the ratio of the peak area of the external and internal standards as the vertical coordinate.
